# Supplementary material for: Urolithin A analog inhibits castration-resistant prostate cancer by targeting the androgen receptor and its variant, androgen receptor-variant 7
Source: Frontiers journal article supplement (doi:10.3389/fphar.2023.1137783), 2023-03-03
Supplement: Data_Sheet_2.PDF [file Data_Sheet_2.PDF]

**In Vitro Metabolic Stability in Microsomes/S9****Scope of Service**

The microsomal/S9 stability assay screens the in vitro metabolic stability of test compounds in microsomes or S9.

**Assay Summary**

|                                   |                                       |
|-----------------------------------|---------------------------------------|
| Final Test Compound Concentration | 0.5 $\mu$ M                           |
| Final Protein Concentration       | 0.5 mg/mL(microsomes)<br>1 mg/mL (S9) |
| Time Points                       | 0, 5, 15, 30, 45, 45 NC*              |
| Positive Control                  | Midazolam<br>Umbelliferone (Phase II) |
| Replicates                        | n=1                                   |

\*NC = No Cofactor

**Solutions**

1. Compound Working Solutions  
Dilute compound stock solutions to 0.05 mM in DMSO: Water (1:1, v/v)
2. Potassium Phosphate Buffer (KPi)  
KPi prepared at 100 mM , pH 7.4
3. NADPH Regenerating System, Cofactor (5X)  
Prepare a solution containing NADP (1.7 mg/mL, 2.22 mM) and G6P (7.8 mg/mL, 27.6 mM) in 100 mM KPi. Aliquot and store at -20° C. Warm to 37° C and add G6PDH (2.0 U/mL) before use.  
  
Optional cofactors (5X): UDPGA (2.6 mg/mL), PAPS (0.32 mg/mL), alamethicin (125  $\mu$ g/mL)
4. Stop Solution  
ACN containing 100 ng/mL tolbutamide

**General Procedures**

1. Thaw microsomes/S9 in the water bath (37° C), and then keep on ice once thawed.
2. Add 200  $\mu$ L stop solution/well to a 96-deep well sample collection plate. Cover plate with a sealing mat and keep on ice.
3. Prepare 0.625 mg/mL microsomal/S9 mixtures in KPi.
4. Set up a base plate with 1.0 mL glass vials and add 7.5  $\mu$ L compound working solution/vial. Add 592.5  $\mu$ L microsomal/S9 mixture/vial and mix thoroughly by pipetting.

5. Transfer 250 µL of the spiked microsomal/S9 mixtures into two parallel sets of 1.0 mL glass vials. One set will serve as the cofactor incubation (+NADPH) and the other set as the no-cofactor incubation (-NADPH).
6. Add 62.5 µL KPi/vial to the no-cofactor incubation vials (-NADPH), mix by pipetting and transfer 50 µL into the T=0 wells of the sample collection plate.
7. Add 62.5 µL cofactor solution/vial to the cofactor incubation vials (+NADPH), mix by pipetting and place into the incubator (37°C, 5% CO<sub>2</sub>) with shaking at 200 rpm.
8. For the cofactor incubation (+NADPH), mix by pipetting and transfer 50 µL at 5, 15, 30, and 45 minutes into the corresponding wells of the sample collection plate.
9. For the no-cofactor incubation (-NADPH), mix by pipetting and transfer 50 µL at 45 minutes into the corresponding wells of the sample collection plate.
10. Vortex sample collection plate at 1700 rpm for 3 minutes.
11. Centrifuge sample collection plate at 1380 x g for 10 minutes.
12. Take a new 96-deep well plate and add 100 µL ultrapure water/well. Transfer 100 µL supernatant/well from the sample collection plate into the corresponding wells of the final plate.
13. Vortex the final plate at 1700 rpm for 1 minute and analyse samples by LC-MS/MS.

**Data Analysis**

The elimination rate constant ( $k$ , min<sup>-1</sup>) is calculated using nonlinear regression fitting with the following equation:

$$C_t = C_{t=0} \times e^{(-k \times t)}$$

where,

$C_{t=0}$  = initial concentration represented as the peak area ratio (test compound peak area / internal standard peak area)

$C_t$  = concentration at  $t$  represented as the peak area ratio (test compound peak area / internal standard peak area)

$e$  = base of the natural logarithm

$t$  = time (min)

$k$  = elimination rate constant (min<sup>-1</sup>)

The half-life ( $t_{1/2}$ , min) is calculated using the following equation:

$$t_{1/2} = \frac{0.693}{k}$$

where,

$k$  = elimination rate constant ( $\text{min}^{-1}$ )

The in vitro intrinsic clearance is calculated using the following equation:

$$CL_{\text{int}} = \frac{k}{n} \times \text{scaling factor}$$

where,

$k$  = elimination rate constant ( $\text{min}^{-1}$ )

$n$  = protein concentration ( $\text{mg/mL}$ )

The scaling factors for  $\text{mL/min/g}$  liver are as follows:

48  $\text{mg protein/g liver}$  for mouse,

46  $\text{mg protein/g liver}$  for rat

36.7  $\text{mg protein/g liver}$  for dog

39.7  $\text{mg protein/g liver}$  for human

52.5  $\text{mg protein/g liver}$  for monkey

52.5  $\text{mg protein/g liver}$  for minipig

52.5  $\text{mg protein/g liver}$  for rabbit

The scaling factors for  $\text{mL/min/kg}$  body weight are as follows:

2448  $\text{mg liver microsomal protein/kg body wt}$  for mouse

1656  $\text{mg liver microsomal protein/kg body wt}$  for rat

1192.7  $\text{mg liver microsomal protein/kg body wt}$  for dog

972.6  $\text{mg liver microsomal protein/kg body wt}$  for human

1575  $\text{mg liver microsomal protein/kg body wt}$  for monkey

876.7  $\text{mg liver microsomal protein/kg body wt}$  for minipig

1617  $\text{mg liver microsomal protein/kg body wt}$  for rabbit

The percent remaining is calculated using the following equation:

$$\% \text{ Remaining} = C_{t=0} \div C_{t=45} \times 100$$

where,

$C_{t=0}$  = initial concentration represented as the peak area ratio (test compound peak area/ internal standard peak area)

$C_{t=45}$  = concentration at  $t=24$  minutes represented as the peak area ratio (test compound peak area/internal standard peak area)

### Data Report

A spreadsheet summary report (Microsoft Excel file) including raw data, methodology, elimination rate constant, half-life, intrinsic clearance, and percent remaining is provided.

**In Vitro Stability in Plasma or Blood****Scope of Service**

The stability assay screens the in vitro stability of test compound in plasma or blood.

**Assay Summary**

|                                   |                                                            |
|-----------------------------------|------------------------------------------------------------|
| Final Test Compound Concentration | 1 $\mu$ M                                                  |
| Time Points                       | 0, 15, 30, 60, 120                                         |
| Positive Control                  | Eucatropine: M, MK, H<br>Enalapril: R<br>Aclidinium: MP, D |
| Anticoagulant                     | K2-EDTA                                                    |

**Solutions**

1. Compound Working Solutions  
Dilute test compound stock solutions to 0.1 mM with DMSO: Water (1:1, v/v)
2. Ultrapure Water
3. Stop Solution  
ACN containing 100 ng/mL tolbutamide

**General Procedures**

1. Thaw and pre-warm plasma or blood in the water bath (37°C).
2. Add 400  $\mu$ L stop solution/well for plasma or 50  $\mu$ L ultrapure water/well for blood to a 96-deep well sample collection plate. Cover plate with a sealing mat and keep on ice.
3. Set up a base plate with 1.0 mL glass vials and add 495  $\mu$ L blood/vial.
4. Add 5  $\mu$ L compound working solution/vial to the plasma or blood, mix by pipetting and transfer 50  $\mu$ L into the T=0 wells of the sample collection plate. Allow blood to sit in the water for 1 minute and then add 200  $\mu$ L stop solution/well.
5. Place the base plate into the incubator (37°C, 5% CO<sub>2</sub>) with shaking at 200 rpm.
6. For remaining time points, mix plasma or blood by pipetting and transfer 50  $\mu$ L at 15, 30, 60 and 120 minutes into the corresponding wells of the sample collection plate. For each time point, allow blood to sit in the water for 1 minute and then add 400  $\mu$ L stop solution/well.
7. Vortex sample collection plate at 1700 rpm for 3 minutes.
8. Centrifuge sample collection plate at 1380 x g for 10 minutes.

9. Take a new 96-deep well plate and add 100 µL ultrapure water/well. Transfer 100 µL supernatant/well from the sample collection plate into the corresponding wells of the final plate.
10. Vortex the final plate at 1700 rpm for 1 minute.
11. For blood samples, centrifuge the final plate at 1380 x g for 10 minutes
12. Analyse samples by LC-MS/MS.

**Data Analysis**

The elimination rate constant ( $k$ , min<sup>-1</sup>) is calculated using nonlinear regression fitting with the following equation:

$$C_t = C_{t=0} \times e^{(-k \times t)}$$

where,

$C_{t=0}$  = initial concentration represented as the peak area ratio (test compound peak area/ internal standard peak area)

$C_t$  = concentration at  $t$  represented as the area ratio (test compound peak area / internal standard peak area)

$e$  = base of the natural logarithm

$t$  = time (min)

$k$  = elimination rate constant (min<sup>-1</sup>)

The half-life ( $t_{1/2}$ , min) is calculated using the following equation:

$$t_{1/2} = \frac{0.693}{k}$$

where,

$k$  = elimination rate constant (min<sup>-1</sup>)

**Data Report**

A spreadsheet summary report (Microsoft Excel file) including raw data, methodology, elimination rate constant, half-life, and percent remaining is provided.
